# Supplementary material
Source: Elsevier journal article supplement (https://comptes-rendus.academie-sciences.fr/chimie/article/10.1016/j.crci.2013.09.006/file/attach/mmc1.pdf)

# checkCIF/PLATON report

You have not supplied any structure factors. As a result the full set of tests cannot be run.

No syntax errors found.      CIF dictionary      Interpreting this report

## Datablock: 2

---

Bond precision:    C-C = 0.0040 Å                      Wavelength=0.71073

Cell:                      a=8.6148(2)              b=31.8694(4)              c=14.8246(3)  
                                    alpha=90                      beta=93.7902(5)              gamma=90

Temperature:              150 K

|                        | Calculated    | Reported      |
|------------------------|---------------|---------------|
| Volume                 | 4061.17(14)   | 4061.17(14)   |
| Space group            | P 21/c        | P 21/c        |
| Hall group             | -P 2ybc       | ?             |
| Moiety formula         | C26 H24 N2 Th | ?             |
| Sum formula            | C26 H24 N2 Th | C26 H24 N2 Th |
| Mr                     | 596.51        | 596.51        |
| Dx,g cm <sup>-3</sup>  | 1.951         | 1.951         |
| Z                      | 8             | 8             |
| Mu (mm <sup>-1</sup> ) | 7.358         | 7.358         |
| F000                   | 2272.0        | 2272.0        |
| F000'                  | 2215.54       |               |
| h,k,lmax               | 12,45,21      | 12,45,21      |
| Nref                   | 12411         | 12383         |
| Tmin,Tmax              | 0.298,0.516   | 0.371,0.516   |
| Tmin'                  | 0.275         |               |

Correction method= MULTI-SCAN

Data completeness= 0.998                      Theta(max)= 30.510

R(reflections)= 0.0248( 10609)              wR2(reflections)= 0.0547( 12383)

S = 0.988                                      Npar= 523

---

The following ALERTS were generated. Each ALERT has the format

**test-name\_ALERT\_alert-type\_alert-level.**

Click on the hyperlinks for more details of the test.

---

### Alert level C

|                   |                                                                 |     |
|-------------------|-----------------------------------------------------------------|-----|
| PLAT048_ALERT_1_C | MoietyFormula Not Given .....                                   | ?   |
| PLAT125_ALERT_4_C | No '_symmetry_space_group_name_Hall' Given .....                | ?   |
| PLAT242_ALERT_2_C | Check Low                      Ueq as Compared to Neighbors for | Th2 |

---

**Alert level G**

PLAT005\_ALERT\_5\_G No \_iucr\_refine\_instructions\_details in the CIF ?

---

0 **ALERT level A** = Most likely a serious problem - resolve or explain  
0 **ALERT level B** = A potentially serious problem, consider carefully  
3 **ALERT level C** = Check. Ensure it is not caused by an omission or oversight  
1 **ALERT level G** = General information/check it is not something unexpected

1 ALERT type 1 CIF construction/syntax error, inconsistent or missing data  
1 ALERT type 2 Indicator that the structure model may be wrong or deficient  
0 ALERT type 3 Indicator that the structure quality may be low  
1 ALERT type 4 Improvement, methodology, query or suggestion  
1 ALERT type 5 Informative message, check

---

**Datablock: 3py2**

---

Bond precision: C-C = 0.0035 A                      Wavelength=0.71073

Cell:                      a=10.4981(5)              b=9.3769(2)              c=15.0666(7)  
                            alpha=90                      beta=98.436(2)              gamma=90

Temperature:              150 K

|                        | Calculated                           | Reported        |
|------------------------|--------------------------------------|-----------------|
| Volume                 | 1467.10(10)                          | 1467.10(10)     |
| Space group            | P 21/m                               | P 21/m          |
| Hall group             | -P 2yb                               | ?               |
| Moiety formula         | C26 H24 N2 Th, C5 H5 K N,<br>C5 H5 N | ?               |
| Sum formula            | C36 H34 K N4 Th                      | C36 H34 K N4 Th |
| Mr                     | 793.81                               | 793.81          |
| Dx, g cm <sup>-3</sup> | 1.797                                | 1.797           |
| Z                      | 2                                    | 2               |
| Mu (mm <sup>-1</sup> ) | 5.257                                | 5.257           |
| F000                   | 774.0                                | 774.0           |
| F000'                  | 760.27                               |                 |
| h,k,lmax               | 14,13,21                             | 14,13,21        |
| Nref                   | 4725                                 | 4721            |
| Tmin,Tmax              | 0.505,0.729                          | 0.460,0.729     |
| Tmin'                  | 0.427                                |                 |

Correction method= MULTI-SCAN

Data completeness= 0.999                      Theta(max)= 30.510

R(reflections)= 0.0237( 4199)              wR2(reflections)= 0.0438( 4721)

S = 0.973                      Npar= 218

---

The following ALERTS were generated. Each ALERT has the format

**test-name\_ALERT\_alert-type\_alert-level.**

Click on the hyperlinks for more details of the test.

---

 **Alert level C**

PLAT048\_ALERT\_1\_C MoietyFormula Not Given ..... ?  
PLAT125\_ALERT\_4\_C No '\_symmetry\_space\_group\_name\_Hall' Given ..... ?

---

 **Alert level G**

PLAT005\_ALERT\_5\_G No \_iucr\_refine\_instructions\_details in the CIF ?  
PLAT764\_ALERT\_4\_G Overcomplete CIF Bond List Detected (Rep/Expd) . 1.45 Ratio  
PLAT790\_ALERT\_4\_G Centre of Gravity not Within Unit Cell: Resd. # 2  
C5 H5 K N  
PLAT790\_ALERT\_4\_G Centre of Gravity not Within Unit Cell: Resd. # 3  
C5 H5 N

---

0 **ALERT level A** = Most likely a serious problem - resolve or explain  
0 **ALERT level B** = A potentially serious problem, consider carefully  
2 **ALERT level C** = Check. Ensure it is not caused by an omission or oversight  
4 **ALERT level G** = General information/check it is not something unexpected

1 ALERT type 1 CIF construction/syntax error, inconsistent or missing data  
0 ALERT type 2 Indicator that the structure model may be wrong or deficient  
0 ALERT type 3 Indicator that the structure quality may be low  
4 ALERT type 4 Improvement, methodology, query or suggestion  
1 ALERT type 5 Informative message, check

---

## checkCIF publication errors

---

 **Alert level A**

PUBL004\_ALERT\_1\_A The contact author's name and address are missing,  
\_publ\_contact\_author\_name and \_publ\_contact\_author\_address.  
PUBL005\_ALERT\_1\_A \_publ\_contact\_author\_email, \_publ\_contact\_author\_fax and  
\_publ\_contact\_author\_phone are all missing.  
At least one of these should be present.  
PUBL006\_ALERT\_1\_A \_publ\_requested\_journal is missing  
e.g. 'Acta Crystallographica Section C'  
PUBL008\_ALERT\_1\_A \_publ\_section\_title is missing. Title of paper.  
PUBL009\_ALERT\_1\_A \_publ\_author\_name is missing. List of author(s) name(s).  
PUBL010\_ALERT\_1\_A \_publ\_author\_address is missing. Author(s) address(es).  
PUBL012\_ALERT\_1\_A \_publ\_section\_abstract is missing.  
Abstract of paper in English.

---

 **Alert level G**

PUBL013\_ALERT\_1\_G The \_publ\_section\_comment (discussion of study) is  
missing. This is required for a full paper submission (but is  
optional for an electronic paper).  
PUBL017\_ALERT\_1\_G The \_publ\_section\_references section is missing or  
empty.

---

7 **ALERT level A** = Data missing that is essential or data in wrong format  
2 **ALERT level G** = General alerts. Data that may be required is missing

---

## Publication of your CIF

You should attempt to resolve as many as possible of the alerts in all categories. Often the minor alerts point to easily fixed oversights, errors and omissions in your CIF or refinement strategy, so attention to these fine details can be worthwhile. In order to resolve some of the more serious problems it may be necessary to carry out additional measurements or structure refinements. However, the nature of your study may justify the reported deviations from journal submission requirements and the more serious of these should be commented upon in the discussion or experimental section of a paper or in the "special\_details" fields of the CIF. *checkCIF* was carefully designed to identify outliers and unusual parameters, but every test has its limitations and alerts that are not important in a particular case may appear. Conversely, the absence of alerts does not guarantee there are no aspects of the results needing attention. It is up to the individual to critically assess their own results and, if necessary, seek expert advice.

If level A alerts remain, which you believe to be justified deviations, and you intend to submit this CIF for publication in Acta Crystallographica Section C or Section E, you should additionally insert an explanation in your CIF using the Validation Reply Form (VRF) below. Your explanation will be considered as part of the review process.

If you intend to submit to another section of Acta Crystallographica or Journal of Applied Crystallography or Journal of Synchrotron Radiation, you should make sure that at least a basic structural check is run on the final version of your CIF prior to submission.

```
# start Validation Reply Form
_vrf_PUBL004_GLOBAL
;
PROBLEM: The contact author's name and address are missing,
RESPONSE: ...
;
_vrf_PUBL005_GLOBAL
;
PROBLEM: _publ_contact_author_email, _publ_contact_author_fax and
RESPONSE: ...
;
_vrf_PUBL006_GLOBAL
;
PROBLEM: _publ_requested_journal is missing
RESPONSE: ...
;
_vrf_PUBL008_GLOBAL
;
PROBLEM: _publ_section_title is missing. Title of paper.
RESPONSE: ...
;
_vrf_PUBL009_GLOBAL
;
PROBLEM: _publ_author_name is missing. List of author(s) name(s).
RESPONSE: ...
;
_vrf_PUBL010_GLOBAL
;
PROBLEM: _publ_author_address is missing. Author(s) address(es).
```

```
RESPONSE: ...
;
_vrf_PUBL012_GLOBAL
;
PROBLEM: _publ_section_abstract is missing.
RESPONSE: ...
;
# end Validation Reply Form
```

If you wish to submit your CIF for publication in Acta Crystallographica Section C or E, you should upload your CIF via the web. If your CIF is to form part of a submission to another IUCr journal, you will be asked, either during electronic submission or by the Co-editor handling your paper, to upload your CIF via our web site.

---

**PLATON version of 05/11/2012; check.def file version of 05/11/2012**

Datablock 2 - ellipsoid plot

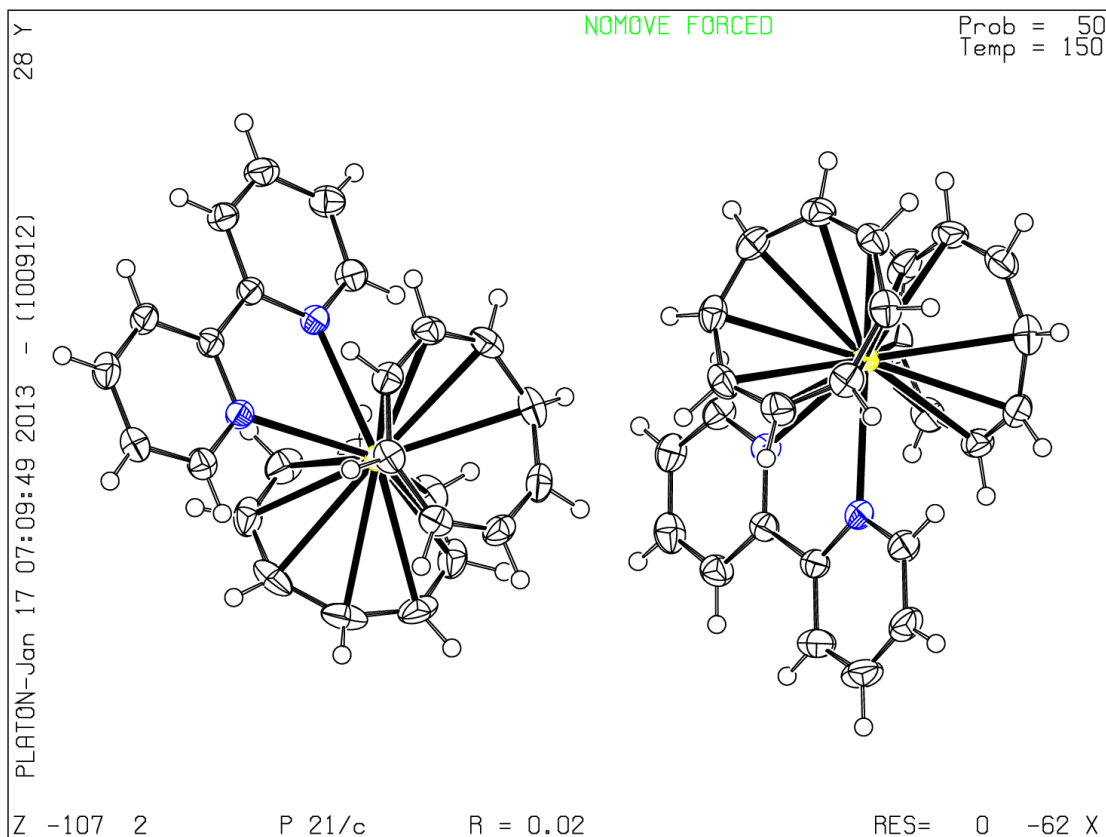

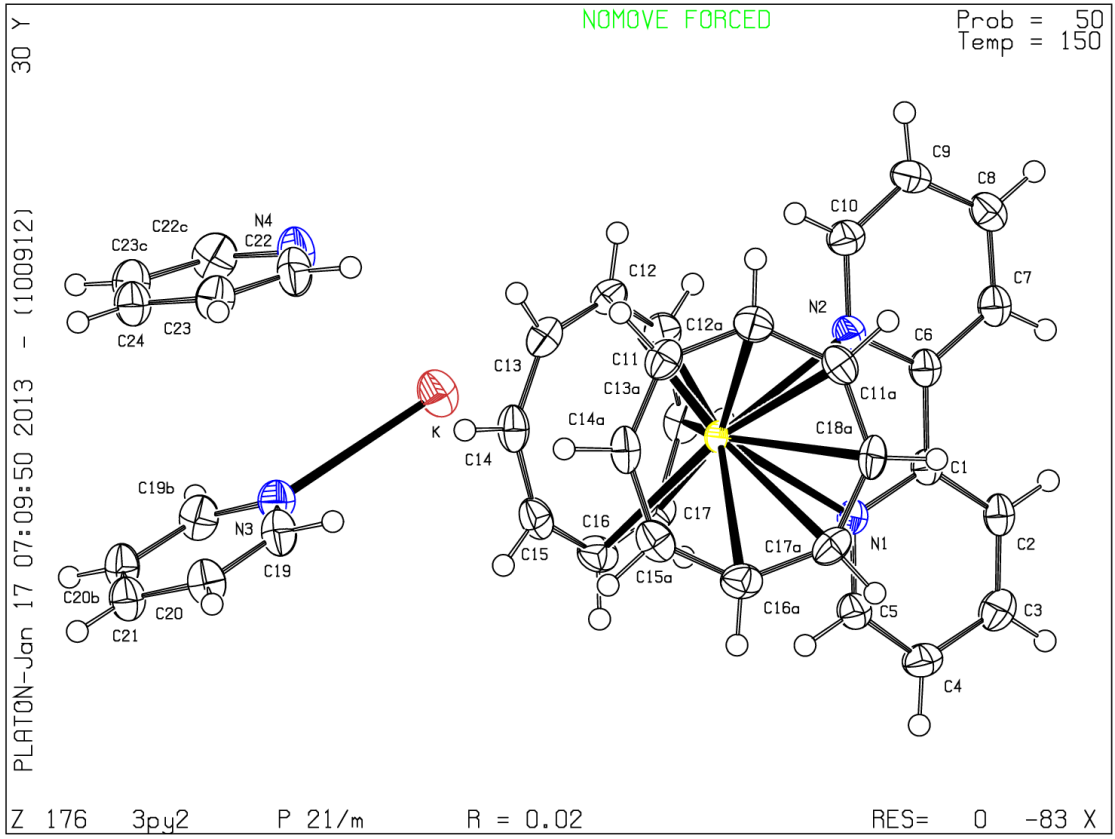

Supplement: mmc1 [file mmc1.pdf]
